# Supplementary material for: Swapping CO2 electro-reduction active sites on a nickel-based hybrid formed on a “guilty” covalent triazine framework
Source: Royal Society of Chemistry journal article supplement (doi:10.1039/d4nr05259e), 2025-01-01
Supplement: d4nr05259e1.pdf [file d4nr05259e1.pdf]

# **Commuting CO<sub>2</sub> Electro-Reduction Active Sites on a Nickel-Based Hybrid Formed on a "Guilty" Covalent Triazine Framework**

Giulia Tuci,<sup>\*,[a]</sup> Miriam Moro,<sup>[b]</sup> Andrea Rossin,<sup>[a]</sup> Claudio Evangelisti,<sup>[c]</sup> Lorenzo Poggini,<sup>[a, d]</sup>

Marco Etzi,<sup>[e]</sup> Enrico Verlato,<sup>[f]</sup> Francesco Paolucci,<sup>[b, f, g]</sup> Yuefeng Liu,<sup>[h]</sup> Giovanni Valenti<sup>\*,[b, g]</sup>

Giuliano Giambastiani <sup>\*,[d, a]</sup>

<sup>[a]</sup> *Institute of Chemistry of OrganoMetallic Compounds, ICCOM-CNR and Consorzio INSTM, Via Madonna del Piano, 10 – 50019, Sesto F.no, Florence, Italy.*

<sup>[b]</sup> *Department of Chemistry “Giacomo Ciamician”, University of Bologna, Via Piero Gobetti 85, 40129 Bologna, Italy.*

<sup>[c]</sup> *Institute of Chemistry of OrganoMetallic Compounds, ICCOM-CNR, Via G. Moruzzi, 1 – 56124 Pisa, Italy.*

<sup>[d]</sup> *University of Florence, Department of Chemistry “U. Schiff” - DICUS – and INSTM Research Unit, Via della Lastruccia 3-13, 50019 Sesto Fiorentino (FI), Italy.*

<sup>[e]</sup> *Center for Sustainable Future Technologies, Fondazione Istituto Italiano di Tecnologia, Via Livorno 60, Torino, 10144, Italy*

<sup>[f]</sup> *Institute of Condensed Matter Chemistry and Technologies for Energy, ICMATE-CNR, 35127 Padova, Italy*

<sup>[g]</sup> *Center for Chemical Catalysis – C3, Alma Mater Studiorum – Università di Bologna, Via Gobetti 85, 40129 Bologna, Italy*

<sup>[h]</sup> *Dalian National Laboratory for Clean Energy (DNL), Dalian Institute of Chemical Physics, Chinese Academy of Science, 457 Zhongshan Road, 116023 Dalian, China*

## Supporting Information

**Table S1.** Textural properties of CTF<sup>ph</sup> and Ni/CTF<sup>ph</sup> at comparison.

| Sample                   | Ni <sup>a</sup> (wt.%) | Materials textural properties <sup>b</sup> |                                          |                                           |
|--------------------------|------------------------|--------------------------------------------|------------------------------------------|-------------------------------------------|
|                          |                        | surface area<br>(m <sup>2</sup> /g)        | Micropore volume<br>(cm <sup>3</sup> /g) | total pore volume<br>(cm <sup>3</sup> /g) |
| CTF <sup>ph</sup>        | -                      | 2046 <sup>c</sup>                          | 0.51                                     | 1.55 <sup>c</sup>                         |
| Ni/CTF <sup>ph</sup> (1) | 9.2                    | 1897                                       | 0.46                                     | 1.32                                      |

<sup>a</sup> determined by ICP-OES; <sup>b</sup> derived from N<sub>2</sub> physisorption isotherms recorded at the liquid N<sub>2</sub> temperature along with the respective pore-size distributions (BJH method) from isotherms desorption branches. <sup>c</sup> data recovered from ref. 1 and reported here for the sake of comparison.

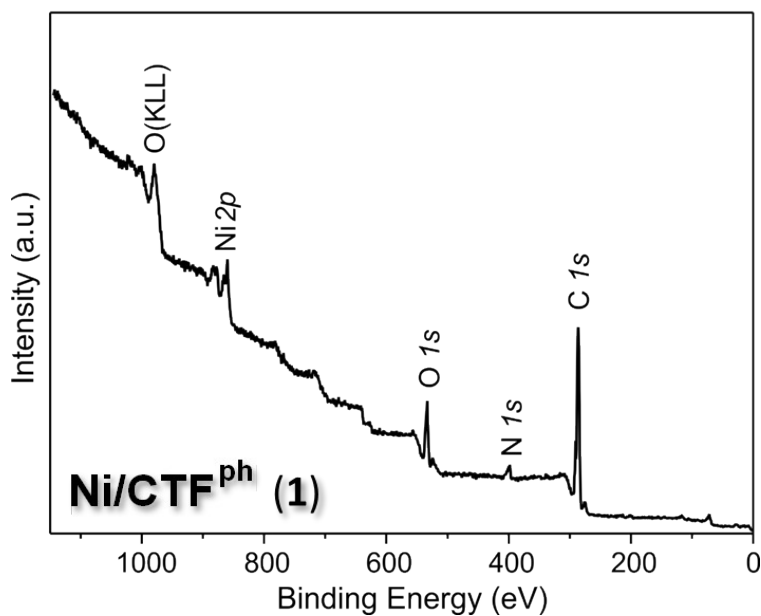

**Fig. S1.** XPS survey spectrum of Ni/CTF<sup>ph</sup> (1).

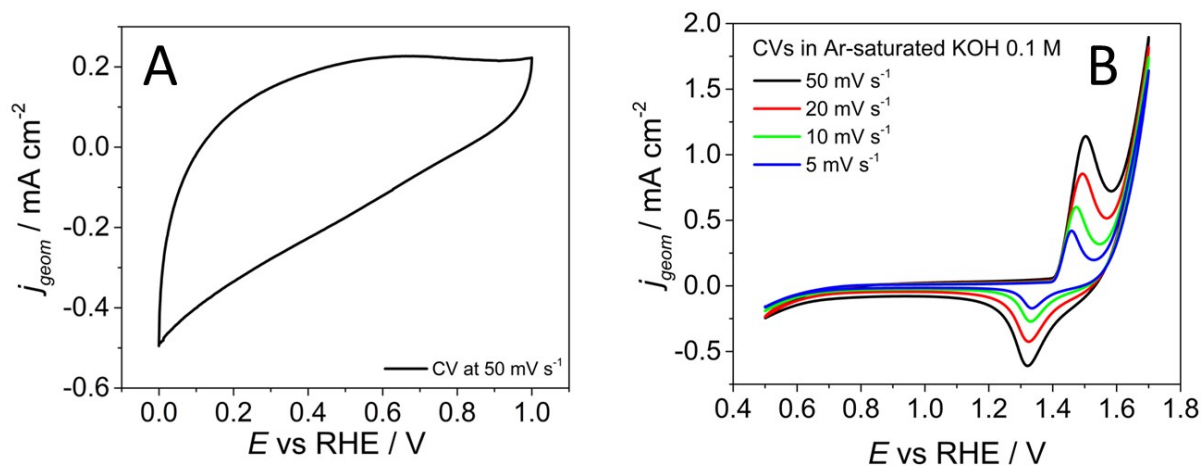

**Fig. S2.** (A) CV of Ni-CTF<sup>ph</sup> at 50 mV s<sup>-1</sup> in Ar-saturated KOH 0.1 M solution and in a narrow range of potentials. (B) CVs of Ni-CTF<sup>ph</sup> in Ar-saturated KOH 0.1 M at different scanning speed: 50 mV s<sup>-1</sup> (black), 20 mV s<sup>-1</sup> (red), 10 mV s<sup>-1</sup> (green) and 5 mV s<sup>-1</sup> (blue) and in the 0.4-1.8 range of potentials vs. RHE. Potentials were corrected for the ohmic drop taking into consideration the resistance of the system (pH = 13), while the current intensity was normalized for the geometric area of the electrode ( $j_{\text{geom}}$ ).

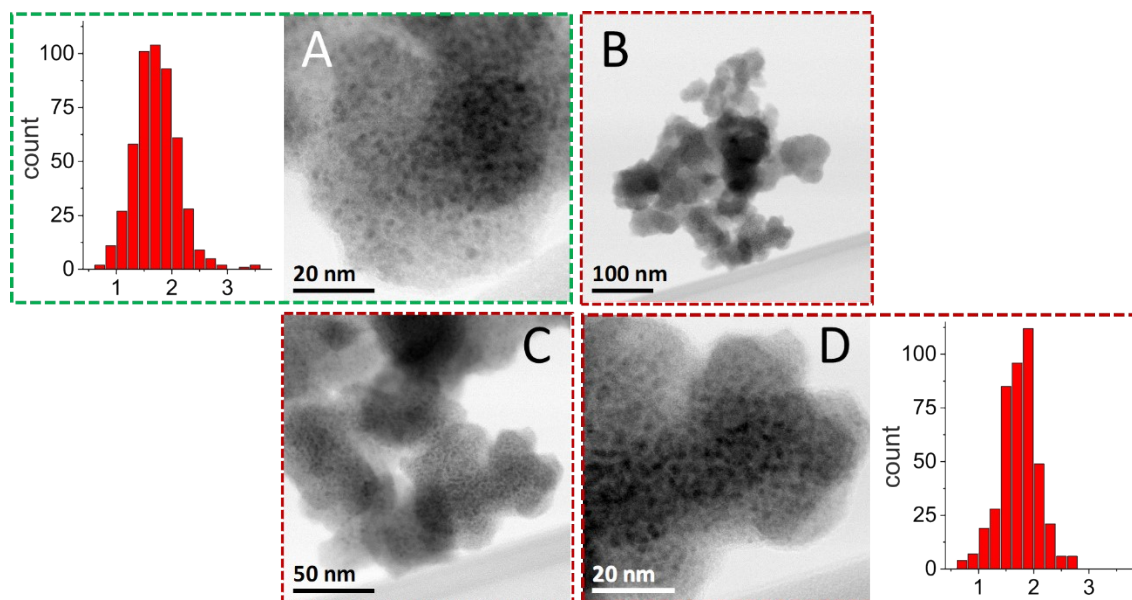

**Fig. S3.** HR-TEM images of the freshly prepared Ni/CTF<sup>ph</sup> (1) and its used counterpart at different magnifications. Red histograms refer to the nickel particle size distribution as measured over more than 100 NPs on both pristine and used samples.

## *Supporting Information*

### **References**

1. M. Moro, G. Tuci, A. Rossin, C. Salvatici, E. Verlato, C. Evangelisti, F. Paolucci, G. Valenti, Y. Liu and G. Giambastiani, An ad-hoc Pyrolized Phoenix-like Covalent Triazine Framework for the Selective CO<sub>2</sub>-to-Formate Electroreduction, *ACS Mater. Lett.*, 2024, **6**, 583-589. DOI: 10.1021/acsmaterialslett.3c01316
